# Supplementary material for: Evaluation of variant calling for cpn60 barcode sequence-based microbiome profiling
Source: PubMed Central journal article supplement (PMC7347135; doi:10.1371/journal.pone.0235682), 2020-07-09
Supplement: pone.0235682.s001.pdf [file pone.0235682.s001.pdf]

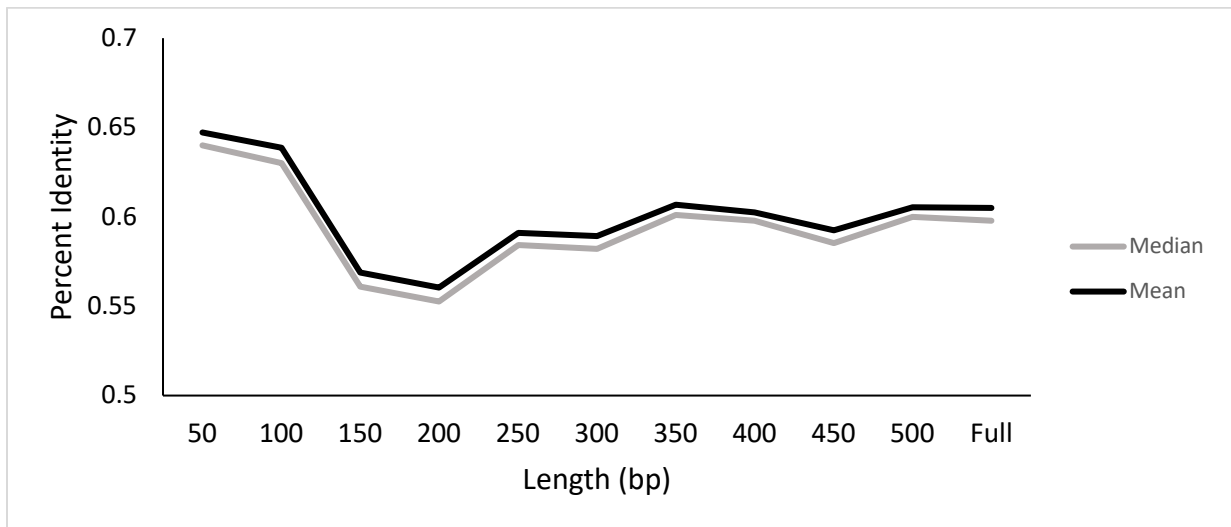

**Figure S1: Multiple All vs. All bacterial cpnDB\_nr alignments.** Various lengths starting from the 5' end of the *cpn60* UT were extracted from a bacteria-only version of cpnDB\_nr. Alignments were conducted with clustalw2 and a similarity table was formed with dnadist from the phylip package. Mean and median percent identities were determined for each set of alignments.
