# Supplementary material for: Evaluation of variant calling for cpn60 barcode sequence-based microbiome profiling
Source: PubMed Central journal article supplement (PMC7347135; doi:10.1371/journal.pone.0235682), 2020-07-09
Supplement: pone.0235682.s002.pdf [file pone.0235682.s002.pdf]

**Table S1: Illumina adapted *cpn60* PCR primer sequences.**

| <b>Primer</b> | <b>Sequence (5'-3')</b>                                                            |
|---------------|------------------------------------------------------------------------------------|
| M279          | TCG TCG GCA GCG TCA GAT GTG TAT AAG AGA CAG GAI III GCI GGI GAY<br>GGI ACI ACI AC  |
| M280          | GCT TCG TGG GCT CGG AGA TGT GTA TAA GAG ACA GYK IYK ITC ICC RAA<br>ICC IGG IGC YTT |
| M1612         | TCG TCG GCA GCG TCA GAT GTG TAT AAG AGA CAG GAI III GCI GGY GAC<br>GGY ACS ACS AC  |
| M1613         | GCT TCG TGG GCT CGG AGA TGT GTA TAA GAG ACA GCG RCG RTC RCC<br>GAA GCC SGG IGC CTT |

---
